# Supplementary material for: A Hydrogen-Sulfide-Repressed Methionine Synthase SlMS1 Acts as a Positive Regulator for Fruit Ripening in Tomato
Source: MDPI journal article supplement (doi:10.3390/ijms232012239), 2022-10-13
Supplement: s1 [file s1]

## SUPPLEMENTARY MATERIAL

**Supplementary Table S1.** Transcription data of *SIMS1* and *SIMS2* gene under 0, 1, 3 days of hydrogen sulfide (H<sub>2</sub>S) treatment (0.6 mM NaHS as H<sub>2</sub>S donor).

| Gene  | CK 0 d | H <sub>2</sub> S 1 d | CK 1 d | H <sub>2</sub> S 3 d | CK 3d  |
|-------|--------|----------------------|--------|----------------------|--------|
| SIMS1 | 321.64 | 247.5                | 328.28 | 129.3                | 323.67 |
| SIMS2 | 21.68  | 20.37                | 17.06  | 14.88                | 20.85  |

**Supplementary Table S2.** Primers for VIGS-*SIMSI* and *SIMSI*-pSAK277 vectors.

| Gene               | Primers                   | Sequences                                          | Amplicon size (bp) |
|--------------------|---------------------------|----------------------------------------------------|--------------------|
| Solyc10g081510.1.1 | <i>SIMSI</i> -277-F       | ACTAGTGGATCCAAAGAATTCATGGC<br>ATCTCATGTTGTTGGATAT  | 2298               |
|                    | <i>SIMSI</i> -277-R       | TCATTAAAGCAGGACTCTAGATCACTT<br>GGCGCTGGCGAG        |                    |
|                    | VIGS- <i>SIMSI</i> -<br>F | GTGAGTAAGGTTACCGAATTCATGTG<br>TGAAGCCACCAATCATCT   | 400                |
|                    | VIGS- <i>SIMSI</i> -<br>R | CGTGAGCTCGGTACCGGATCCGTTGA<br>AGTTGGAGTAGCACATGTGA |                    |
|                    | GFP- <i>SIMSI</i> -F      | GAGAACACGGGGGACTCTAGAATGG<br>CATCTCATGTTGTTGG      | 2298               |
|                    | GFP- <i>SIMSI</i> -R      | GCCCTTGCTCACCATGGATCCCTTGGC<br>GCTGGCGAGC          |                    |

**Supplementary Table S3.** Primers used for quantitative RT-PCR.

| Primers                 | Sequence                | Gene ID            | Amplicon size<br>(bp) |
|-------------------------|-------------------------|--------------------|-----------------------|
| <i>SISGR1</i> (forward) | GGCTATCTCCCAAACCATCAA   | Solyc08g080090     | 80                    |
| <i>SISGR1</i> (reverse) | ACTCTGCAACAACCTTCATCTCT |                    |                       |
| <i>SIPPH</i> (forward)  | CAGATGTCGTGGATGGGAAA    | Solyc01g088090     | 101                   |
| <i>SIPPH</i> (reverse)  | GCCTTTAGCTTCACTTGGTAAAC |                    |                       |
| <i>SIPAO</i> (forward)  | CCTCATCGTCTTGCTCCTTTAT  | Solyc11g066440     | 119                   |
| <i>SIPAO</i> (reverse)  | GCAGCTTGAGGTATCCTTGT    |                    |                       |
| <i>SINYC1</i> (forward) | GATCAGGGAAGAGCACTGTATG  | Solyc07g024000     | 128                   |
| <i>SINYC1</i> (reverse) | GAGAACACAGACACCCAAGTAT  |                    |                       |
| <i>SIPSY1</i> (forward) | GAAGATGCCAGAAGAGGAAGAG  | Solyc03g031860     | 93                    |
| <i>SIPSY1</i> (reverse) | GGTCACCCTTCCAGCAAATA    |                    |                       |
| <i>SIPDS</i> (forward)  | CAAGACCAGAGCTGGACAATAC  | Solyc03g123760     | 119                   |
| <i>SIPDS</i> (reverse)  | CAAACCTGCACCAGCAATAAC   |                    |                       |
| <i>SIZDS</i> (forward)  | GATTGGTTCCTCAGAAGTGGAG  | Solyc01g097810     | 101                   |
| <i>SIZDS</i> (reverse)  | CCAGCCATTGTAGCGTAGTT    |                    |                       |
| <i>SLACO1</i> (forward) | CCATGTCCTAAGCCCGATT     | NM_001247095.<br>2 | 94                    |
| <i>SLACO1</i> (reverse) | GGCCACTCACTTTGTCATCT    |                    |                       |
| <i>SLACO3</i> (forward) | GCGCCATCTTCCTACTTCTAAT  | Solyc07g049550     | 103                   |
| <i>SLACO3</i> (reverse) | CTCAGCCAACTTCTCCAATCT   |                    |                       |

---

|                            |                                                 |                |     |
|----------------------------|-------------------------------------------------|----------------|-----|
| <i>SLACS2</i> (forward)    | GAGGTTCGTAGGTGTTGAGAAA                          | Solyc01g095080 | 147 |
| <i>SLACS2</i> (reverse)    | GGAGGAATAGGTGACGAAAGTG                          |                |     |
| <i>SLPG</i> (forward)      | TTGGAGGAGGAGGAACTATCA                           | Solyc10g080210 | 83  |
| <i>SLPG</i> (reverse)      | CCTGCATGGCAGTGATTTATTT                          |                |     |
| <i>SICEL2</i> (forward)    | CTGCTGTTTGGCCTTTCTATTG                          | Solyc09g010210 | 94  |
| <i>SICEL2</i> (reverse)    | TGCCTTCTTCTTGTTGCTTTATG                         |                |     |
| <i>SLEXP</i> (forward)     | CCGACGATTGGACACCTAAA<br>GGTCCTCCTTAATCAAAGGACAT | Solyc06g051800 | 105 |
| <i>SLEXP</i> (reverse)     | A                                               |                |     |
| <i>SITBG4</i> (forward)    | GCCATTGGCCTGGATACATA                            | Solyc12g008840 | 101 |
| <i>SITBG4</i> (reverse)    | AGAAGGTTGTCCGCAGTTAG                            |                |     |
| <i>SIXTH5</i> (forward)    | AGGATTCAGCCATCTCTTTGG                           | Solyc01g081060 | 101 |
| <i>SIXTH5</i> (reverse)    | ACTTGAACCCTGAACCTGTG                            |                |     |
| <i>SlTubulin</i> (forward) | TAGAGCCTGGTACGATGGATAG                          | Solyc08g006890 | 134 |
| <i>SlTubulin</i> (reverse) | CAACTCAGCGCCTTCAGTATAA                          |                |     |

---

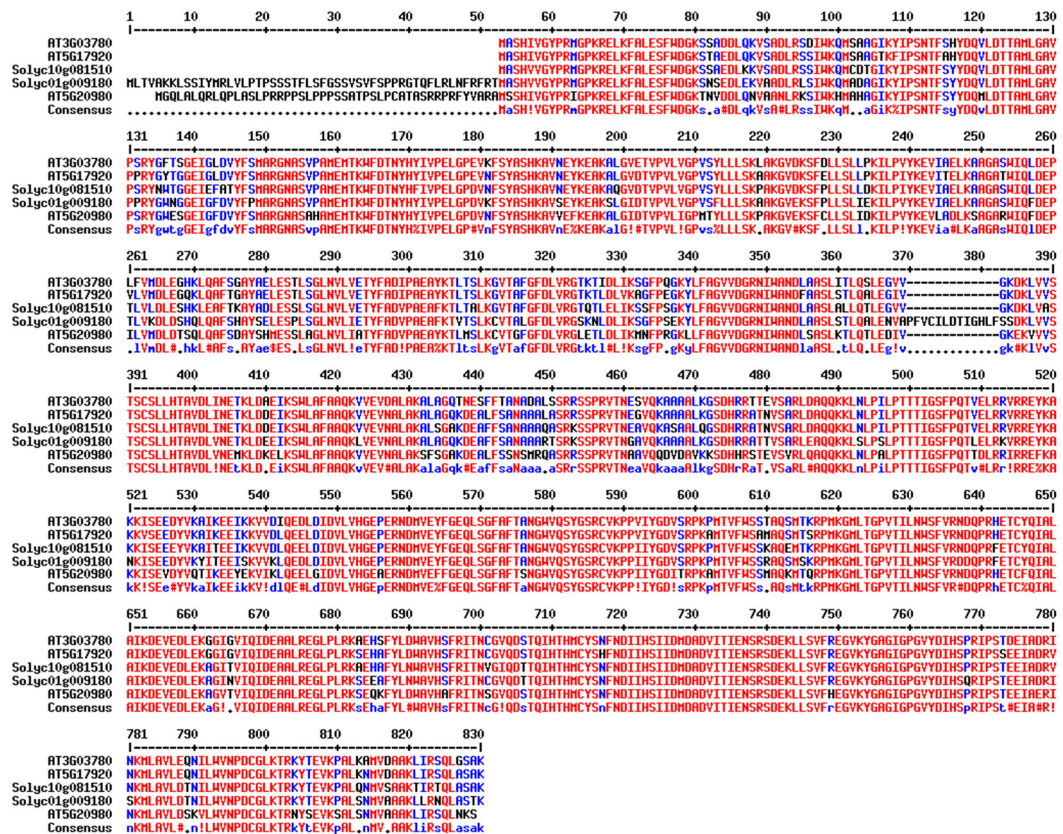

**Supplementary Figure S1.** Amino acid sequence alignment of methionine synthases in Arabidopsis and tomato.

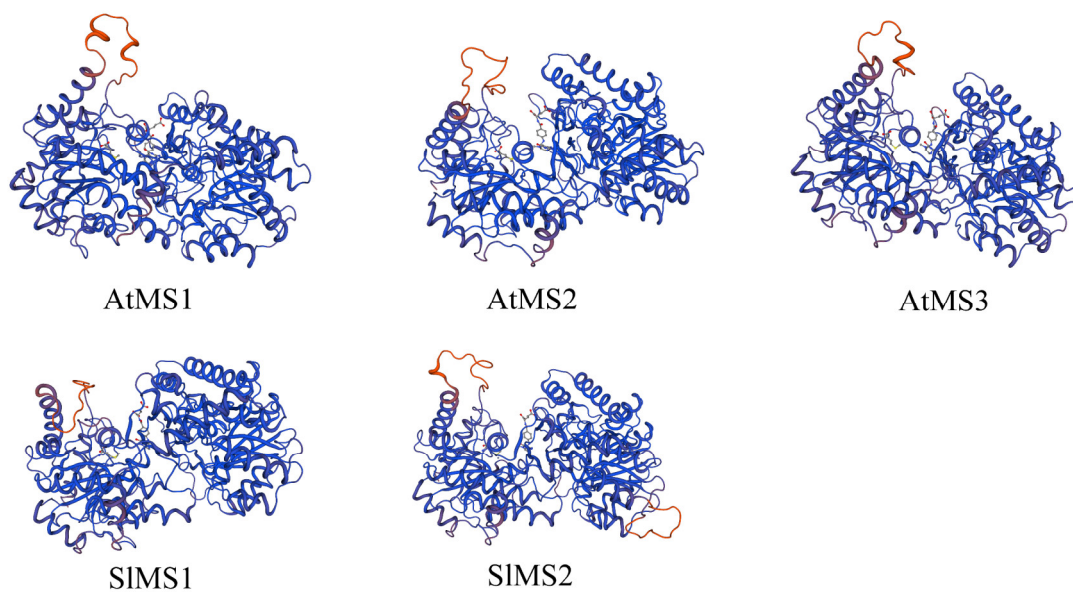

**Supplementary Figure S2.** Tertiary structures of methionine synthases in Arabidopsis and tomato.
